# Supplementary material
Source: PubMed Central journal article supplement (PMC4531258)
Supplement: NIHMS646553-supplement.pdf [file NIHMS646553-supplement.pdf]

### Synthesis

### Stability

### Exonic expression

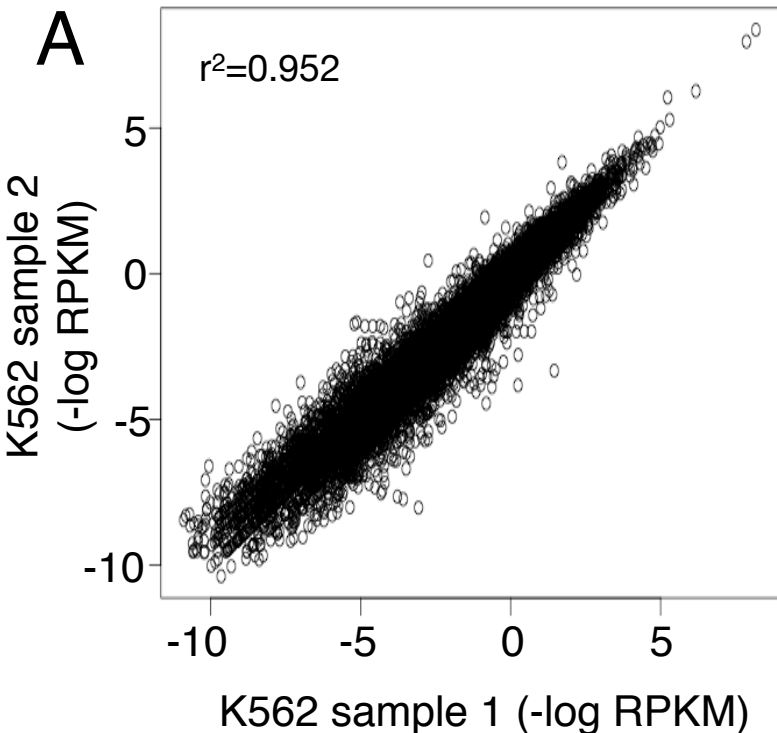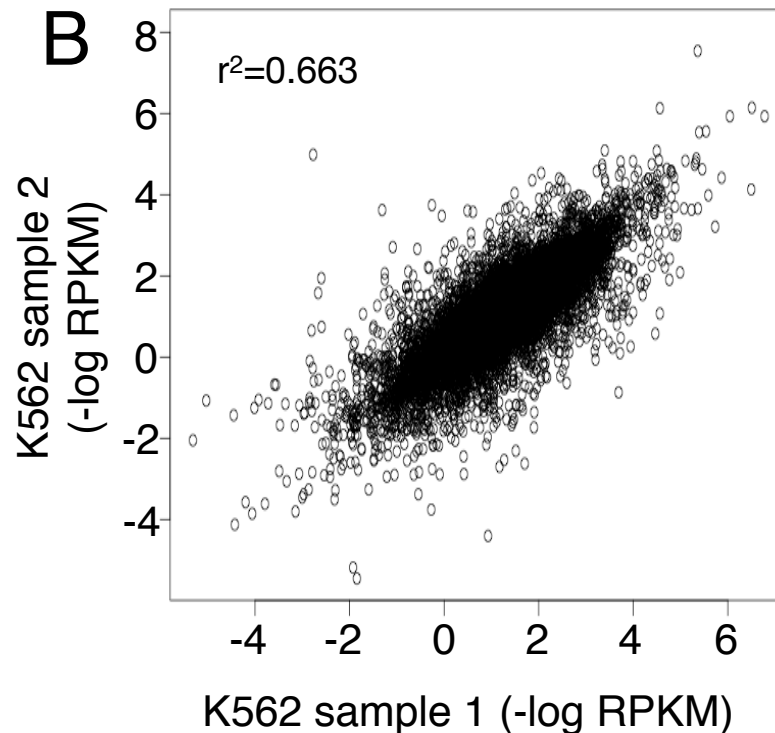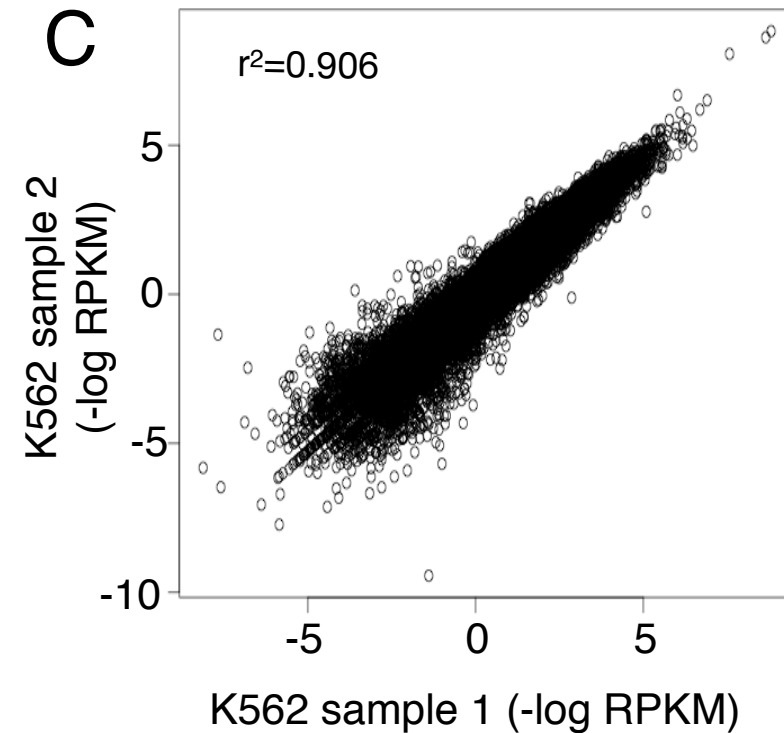

**Supplemental Figure 1.** Comparison plots of two biological experiments involving K562 cells comparing (A) synthesis, (B) stability and (C) exonic expression after 6h chase. The correlation between the two samples are expressed as  $r^2$ .
